# Supplementary material
Source: PubMed Central journal article supplement (PMC6778719)
Supplement: NIHMS1538174-supplement-429_2019_1940_MOESM1_ESM.pdf [file NIHMS1538174-supplement-429_2019_1940_MOESM1_ESM.pdf]

## Supplementary material: literature analysis.

For rat studies, we used the scaling rules for rodent cortex from physical fractionator work (Herculano-Houzel et al., 2006) to convert counts to mouse (Table S1). Specifically, the following multipliers were used to convert rat data to mouse: 0.34 for pooled neurons and glia; 0.41 for neurons; and 0.29 for glia.

Table S1: Rat to Mouse Scaling (Herculano-Houzel et al., 2006: Cellular scaling rules for rodent brains).

| Species | Total cells ( $\times 10^6$ ) | % Total cell in cortex | Total neurons ( $\times 10^6$ ) | % Total neurons in cortex | Total cells in cortex | Total neurons in cortex |
|---------|-------------------------------|------------------------|---------------------------------|---------------------------|-----------------------|-------------------------|
| Mouse   | 108.69 $\pm$ 16.25            | 24                     | 70.89 $\pm$ 10.41               | 20                        | 26 $\times 10^6$      | 14 $\times 10^6$        |
| Rat     | 331.65 $\pm$ 8.84             | 23                     | 200.13 $\pm$ 12.17              | 17                        | 76 $\times 10^6$      | 34 $\times 10^6$        |

Table S2: Additional assumptions used to deduce or interpret cell counts values from the literature.

| # | Assumptions                                                                                                                                                                         |
|---|-------------------------------------------------------------------------------------------------------------------------------------------------------------------------------------|
| 1 | We consider the number of glial cells in the principal layers of CA1, CA2, CA3 and DG as negligible compared to the number of neurons in the same parcels.                          |
| 2 | We used the combined data from CA2 and CA3 for our comparisons since not enough data exist on these two regions separately for a robust comparison with our numbers.                |
| 3 | We consider Herculano-Houzel's neuron and non-neuron numbers as corresponding to the reported distribution averages of 400,019 $\pm$ 36,262 and 574,736 $\pm$ 33,256, respectively. |

Table S3: Multiple source derivation of the average counts used in Table 1 of main text for a. DG; b. CA2/3; c. CA1; d. subiculum; and e. entorhinal cortex.

| a. Dentate Gyrus (Excluding granule cell layer) |                  |                  |                    |         |          |                 |                   |         |           |                            |
|-------------------------------------------------|------------------|------------------|--------------------|---------|----------|-----------------|-------------------|---------|-----------|----------------------------|
| Neurons                                         |                  |                  |                    |         |          |                 | Glia              |         |           |                            |
| DGmo                                            |                  |                  | DGpo               |         |          |                 | Glia              |         |           |                            |
|                                                 |                  |                  | Source             | Species | Original | Scaled to mouse | Source            | Species | Cell Type | Original                   |
| Source                                          | Kim et al., 2017 | Ero et al., 2018 | Grady et al., 2003 | Rat     | 65,420   | 26,822          | Long et al., 1998 | Mouse   | Microglia | 22,000 (DGmo + DG-Granule) |
|                                                 |                  |                  |                    |         |          |                 | Ero et al.,       | Mouse   | Microglia | 84,459/2 = 42,230          |

|                                                                                                                   |                                    |                       |                                       |       |                      |                                                                       |                                                    |        |                                               |                     |                            |                |  |  |
|-------------------------------------------------------------------------------------------------------------------|------------------------------------|-----------------------|---------------------------------------|-------|----------------------|-----------------------------------------------------------------------|----------------------------------------------------|--------|-----------------------------------------------|---------------------|----------------------------|----------------|--|--|
|                                                                                                                   |                                    |                       |                                       |       |                      |                                                                       | 2018                                               |        |                                               |                     |                            |                |  |  |
|                                                                                                                   |                                    |                       |                                       |       |                      |                                                                       | Long et al., 1998                                  | Mouse  | Astrocytes                                    |                     | 70,000 (DGmo + DG-Granule) |                |  |  |
|                                                                                                                   |                                    |                       |                                       |       |                      |                                                                       | Ero et al., 2018                                   | Mouse  | Astrocytes                                    |                     | $55,756/2 = 27,878$        |                |  |  |
| Species                                                                                                           | Mouse                              | Mouse                 | Fitting et al., 2009                  | Rat   | 52,495               | 21,523                                                                | Ero et al., 2018                                   | Mouse  | Oligodendrocytes                              |                     | $49,720/2 = 24,860$        |                |  |  |
|                                                                                                                   |                                    |                       | Hilus (DGpo)                          |       |                      |                                                                       |                                                    | Source | Species                                       | Cell Type           | Original                   | Scaled to mice |  |  |
| Count                                                                                                             | $2,817/2 = 1,408$<br>(PV+VIP +SST) | $280,099/2 = 140,049$ | Mulders et al., 1997                  | Rat   | 53,000               | 21,730                                                                | Ramsden et al., 2003                               | Rat    | All glia                                      | 102,000             | 29,580                     |                |  |  |
|                                                                                                                   |                                    |                       | Lister et al., 2006                   | Rat   | 49,275               | 20,203                                                                | Kaae et al., 2012 (FRL)                            | Rat    | All glia                                      | 99,600              | 28,884                     |                |  |  |
|                                                                                                                   |                                    |                       | Sousa et al., 1998                    | Rat   | 45,000               | 18,450                                                                | Ero et al., 2018                                   | Mouse  | All glia                                      | $65,962/2 = 32,981$ |                            |                |  |  |
| Average DGmo neurons = $(1,408 + 140,049)/2 = 70,729$                                                             |                                    |                       | Rasmussen et al., 1996                | Rat   | 40,000               | 16,400                                                                | Total Glia: Sum of averages from the above studies |        | $(32,115+48,939+24,860) + (30,482) = 136,396$ |                     |                            |                |  |  |
|                                                                                                                   |                                    |                       | Kim et al., 2017                      | Mouse | 7,289                | Total Glia Dentate Gyrus: $((103,000+94,967)/2) + (30,481) = 129,464$ |                                                    |        |                                               |                     |                            |                |  |  |
|                                                                                                                   |                                    |                       | Ero et al., 2018                      | Mouse | $126,772/2 = 63,386$ |                                                                       |                                                    |        |                                               |                     |                            |                |  |  |
|                                                                                                                   |                                    |                       | Average Hilus (DGpo) neurons = 24,635 |       |                      |                                                                       |                                                    |        |                                               |                     |                            |                |  |  |
| Murakami et al., 2018 - all cells (neurons + glia) in DGmo+DGpo (excluding granule layer) = $549,622/2 = 274,811$ |                                    |                       |                                       |       |                      |                                                                       |                                                    |        |                                               |                     |                            |                |  |  |
| Average of Murakami and others: $((70,729+24,635+136,396) + 274,811)/2$                                           |                                    |                       |                                       |       |                      |                                                                       |                                                    |        |                                               |                     |                            |                |  |  |
| <b>Total DG cells excluding granule cell layer = 253,286</b>                                                      |                                    |                       |                                       |       |                      |                                                                       |                                                    |        |                                               |                     |                            |                |  |  |

| b. CA2/3 (Excluding pyramidal cell layers)                                                                           |                              |                  |                    |                                                     |           |          |                 |
|----------------------------------------------------------------------------------------------------------------------|------------------------------|------------------|--------------------|-----------------------------------------------------|-----------|----------|-----------------|
| Neurons                                                                                                              |                              |                  |                    | Glia                                                |           |          |                 |
| Source                                                                                                               | Kim et al.,                  | Ero et al., 2018 | Source             | Species                                             | Cell Type | Original | Scaled to mouse |
| Species                                                                                                              | Mouse                        | Mouse            | Grady et al., 2003 | Rat                                                 | All glia  | 470,000  | 136,300         |
| Count                                                                                                                | 20,060/2=10,030 (PV+VIP+SST) | 127,836          | Ero et al., 2018   | Mouse                                               | All glia  | 105,869  |                 |
| Average of neurons = $(10,030 + 127,836)/2 = 68,933$                                                                 |                              |                  |                    | Average of glia = $(136,300 + 105,869)/2 = 121,085$ |           |          |                 |
| Murakami et al., 2018 - all cells (neurons + glia) in CA2 + CA3 (excluding principal layers) = $326,876/2 = 163,438$ |                              |                  |                    |                                                     |           |          |                 |
| Average of Murakami and others: $((121,085 + 68,933) + (163,438))/2$                                                 |                              |                  |                    |                                                     |           |          |                 |
| <b>Total CA2/3 cells excluding principal cell layers = 176,728</b>                                                   |                              |                  |                    |                                                     |           |          |                 |

| c. CA1 (Excluding pyramidal cell layer) |         |                                                       |                       |                    |         |                  |                   |                 |
|-----------------------------------------|---------|-------------------------------------------------------|-----------------------|--------------------|---------|------------------|-------------------|-----------------|
| Neurons                                 |         |                                                       |                       | Glia               |         |                  |                   |                 |
| CA1                                     |         |                                                       |                       | CA1 All            |         |                  |                   |                 |
| Source                                  | Species | Original                                              | Scaled to mouse       | Source             | Species | Cell Type        | Original          | Scaled to mouse |
| Bezaire et al., 2016                    | Rat     | 27,240                                                | 11,168 (Interneurons) | Grady et al., 2003 | Rat     | Astrocytes       | 190,000           | 55,100          |
|                                         |         |                                                       |                       | Long et al., 1998  | Mouse   | Astrocytes       | 100,000           |                 |
| Ero et al., 2018                        | Mouse   | 345,910/2=172,955 (excluding principal layer neurons) |                       | Ero et al., 2018   | Mouse   | Astrocytes       | 59,141/2 = 29,571 |                 |
|                                         |         |                                                       |                       | Grady et al., 2003 | Rat     | Oligodendrocytes | 185,000           | 53,650          |
| Kim et al.,                             | Mouse   | 20,572/2= 10,286                                      |                       | Ero et al., 2018   | Mouse   | Oligodendrocytes | 99049/2 = 49,525  |                 |

|                                                                                                             |                  |                                                                                 |       |                                                                                    |                    |        |
|-------------------------------------------------------------------------------------------------------------|------------------|---------------------------------------------------------------------------------|-------|------------------------------------------------------------------------------------|--------------------|--------|
| 2017                                                                                                        | (CA1 PV+VIP+SST) | Grady et al., 2003                                                              | Rat   | Microglia                                                                          | 95,000             | 27,550 |
|                                                                                                             |                  | Long et al., 1998                                                               | Mouse | Microglia                                                                          | 48,000             |        |
|                                                                                                             |                  | Ero et al., 2018                                                                | Mouse | Microglia                                                                          | 118,872/2 = 59,436 |        |
| Averaged Neurons of CA1 except principal layer cells =<br>(11,168+10,286+172,955)/3 = 64,803                |                  | Total glia (Sum of the averages of astrocytes, oligodendrocytes and microglia): |       | (55,100+100,000+29,571)/3 + (53,650+49,525)/2 + (27,550+48,000+59,436)/3 = 158,140 |                    |        |
| Murakami et al., 2018 - all cells (neurons + glia) in CA1 (excluding principal layer) = 463,665/2 = 231,832 |                  |                                                                                 |       |                                                                                    |                    |        |
| Average of Murakami and others: (231,832 + (64,803+ 158,140))/2                                             |                  |                                                                                 |       |                                                                                    |                    |        |
| <b>Total CA1 cells excluding principal cell layer = 227,388</b>                                             |                  |                                                                                 |       |                                                                                    |                    |        |

| d. Subiculum                                                                          |         |                     |                 |                                                          |         |                  |                                                      |                 |
|---------------------------------------------------------------------------------------|---------|---------------------|-----------------|----------------------------------------------------------|---------|------------------|------------------------------------------------------|-----------------|
| Neurons                                                                               |         |                     |                 | Glia                                                     |         |                  |                                                      |                 |
| Source                                                                                | Species | Original            | Scaled to mouse | Source                                                   | Species | Cell Type        | Original                                             | Scaled to mouse |
| Mulders et al., 1997                                                                  | Rat     | 300000              | 123,000         | Fitting et al., 2009                                     | Rat     | Astrocytes       | 74,432                                               | 21,585          |
| Lister et al., 2006 (left side)                                                       | Rat     | 193725              | 79,427          | Fitting et al., 2009                                     | Rat     | Oligodendrocytes | 159,514                                              | 46,259          |
| Andrade et al., 2000 (female)                                                         | Rat     | 300000              | 123,000         | Ero et al., 2018                                         | Mouse   | Astrocytes       | 26,212/2 = 13,106                                    |                 |
| Andrade et al., 2000 (male)                                                           | Rat     | 350000              | 143,500         | Ero et al., 2018                                         | Mouse   | Oligodendrocytes | 65,827/2 = 32,914                                    |                 |
| Fitting et al., 2009                                                                  | Rat     | 312252              | 128,023         | Ero et al., 2018                                         | Mouse   | Microglia        | 50,869/2 = 25,435                                    |                 |
| Ero et al., 2018                                                                      | Mouse   | 435,628/2 = 217,814 |                 | Astrocyte average + Oligodendrocytes average + microglia |         |                  | ((21,585+13,106)/2) + ((46,259+32,914)/2) + 25,435 = |                 |
| Average of neurons from literature                                                    |         |                     | 135,794         | Total glia                                               |         |                  | 82,367                                               |                 |
| Murakami et al., 2018 - all cells (neurons + glia) in Subiculum = 720,360/2 = 360,180 |         |                     |                 |                                                          |         |                  |                                                      |                 |
| Average of Murakami and others: (360,180 + (135,794+82,367))/2                        |         |                     |                 |                                                          |         |                  |                                                      |                 |
| <b>Total cells in the Subiculum = 289,171</b>                                         |         |                     |                 |                                                          |         |                  |                                                      |                 |

| e. Entorhinal Cortex (Lateral + Medial)                                                         |         |                         |                       |
|-------------------------------------------------------------------------------------------------|---------|-------------------------|-----------------------|
| All cells                                                                                       |         |                         |                       |
| Source                                                                                          | Species | Neurons                 | Glia                  |
| Herculano-Houzel et al., 2013                                                                   | Mouse   | 400,019                 | 574,736               |
| Ero et al., 2018                                                                                | Mouse   | $1,082,511/2 = 541,256$ | $626,040/2 = 313,020$ |
| Murakami et al., 2018 - all cells (neurons + glia) in Entorhinal Cortex = $910,927/2 = 455,463$ |         |                         |                       |
| Average of Murakami and others: $(455,463 + ((400,019+541,256)/2) + ((574,736+313,020)/2))/ 2$  |         |                         |                       |
| Total cells in medial and lateral Entorhinal cortex = 684,990                                   |         |                         |                       |
